# Supplementary material for: Traumatic brain injury in England and Wales: prospective audit of epidemiology, complications and standardised mortality
Source: PubMed Central journal article supplement (PMC5168492; doi:10.1136/bmjopen-2016-012197), 2016-11-24
Supplement: bmjopen-2016-012197supp.pdf [file bmjopen-2016-012197supp.pdf]

## Appendix

The Ps14<sup>n</sup> model is a modification of the Ps14 model as described by Bouamra in 2015 with the addition of pupil reactivity. It has been derived from 39451 patients recorded in the TARN database with head injuries of AIS 3 or greater severity admitted to hospital between 2012 and 2015. Table 1 describes the characteristics of these patients and table 2 contains the regression coefficients of which the prediction model is formed.

The model is shown to have good discriminant power (AuROC 0.882, 95% CI 0.878 to 0.887). The calibration of the model was assessed using the Brier score, this shows how close predictions are to the actual outcome. Its value varies between 0 (perfect) and 0.25 (useless), the model shows a value of 0.086. The value for the HL-statistic (Hosper & Lemeshow  $\chi^2(8)$ ) is 19.51, P-value 0.0124 (as the p-value is <0.05 the model failed the goodness-of-fit test but this is expected with the HL-test as it is too sensitive to large sample sizes). Figure 1 shows a graphical assessment of calibration using 200 bootstrap simulations and shows an almost perfect calibration: the observed and expected are aligned to the 45° line.

**Table 1. Characteristics of the patients**

|                    |                    |
|--------------------|--------------------|
| <b>n</b>           | 39451              |
| <b>Age</b>         |                    |
| Median (IQR)       | 62.6 (35.8 - 81.4) |
| <b>ISS</b>         |                    |
| Median (IQR)       | 24 (16 - 26)       |
| <b>GCS</b>         |                    |
| Median (IQR)       | 14 (11 - 15)       |
| <b>Gender</b>      |                    |
| Female             | 13927 (35.3%)      |
| Male               | 25524 (64.7%)      |
| <b>Comorbidity</b> |                    |
| No comorbidity     | 19776 (50.1%)      |
| 1 - 5              | 10617 (26.9%)      |
| 6 - 10             | 3417 (8.7%)        |
| > 10               | 1585 (4.0%)        |
| Not recorded       | 4056 (10.3%)       |
| <b>Mortality</b>   | 16.0%              |

**Table 2. Coefficients of the model**

| <b>Variables</b>                       | <b>Regression Coefficients</b> | <b>p-value</b> | <b>Odds ratio 95% CI</b> |        |
|----------------------------------------|--------------------------------|----------------|--------------------------|--------|
| $(10/ISS)^2 - 0.1920$                  | 3.3294                         | <0.0001        | 22.9                     | 33.8   |
| $(10/ISS)^2 * \log_e(10/ISS) - 0.1584$ | 8.2092                         | <0.0001        | 1719.9                   | 7785.4 |
| <b>GCS</b>                             |                                |                |                          |        |
| GCS =3                                 | -3.0652                        | <0.0001        | 0.04                     | 0.05   |
| GCS 4 -5                               | -2.6485                        | <0.0001        | 0.06                     | 0.08   |
| GCS 6 -8                               | -1.8352                        | <0.0001        | 0.14                     | 0.18   |
| GCS 9 -12                              | -1.3348                        | <0.0001        | 0.23                     | 0.30   |
| GCS 13 - 14                            | -0.4704                        | <0.0001        | 0.57                     | 0.69   |
| GCS 15 (reference)                     | 0.0000                         |                | 1                        | 1      |
| Intubated                              | -2.5212                        | <0.0001        | 0.06                     | 0.11   |
| <b>Charlson Index</b>                  |                                |                |                          |        |
| 0 (reference)                          | 0.0000                         |                | 1                        | 1      |
| 1 - 5                                  | -0.4593                        | <0.0001        | 0.58                     | 0.69   |
| 6 - 10                                 | -0.7754                        | <0.0001        | 0.41                     | 0.52   |
| >10                                    | -1.1841                        | <0.0001        | 0.26                     | 0.36   |
| Not recorded                           | -0.6575                        | <0.0001        | 0.46                     | 0.58   |
| <b>Age</b>                             |                                |                |                          |        |
| 0 - 5                                  | -0.0236                        | 0.92           | 0.63                     | 1.51   |
| 6 - 10                                 | 0.5668                         | 0.07           | 0.95                     | 3.25   |
| 11 - 15                                | 0.0356                         | 0.87           | 0.67                     | 1.60   |
| 16 - 44 (reference)                    | 0.0000                         |                | 1                        | 1      |
| 45 - 54                                | -0.5065                        | <0.0001        | 0.51                     | 0.72   |
| 55 - 64                                | -1.0091                        | <0.0001        | 0.31                     | 0.44   |
| 65 - 75                                | -1.6125                        | <0.0001        | 0.17                     | 0.23   |
| >75                                    | -2.7684                        | <0.0001        | 0.05                     | 0.07   |
| <b>Gender</b>                          |                                |                |                          |        |
| Male (reference)                       | 0.0000                         |                | 1                        | 1      |
| Female                                 | -0.0216                        | 0.84           | 0.79                     | 1.21   |
| <b>Age by gender interaction</b>       |                                |                |                          |        |
| 0 - 5 & Female                         | -0.1968                        | 0.55           | 0.43                     | 1.58   |
| 6 - 10 & Female                        | -0.3357                        | 0.55           | 0.24                     | 2.14   |
| 11 - 15 & Female                       | 0.8354                         | 0.11           | 0.83                     | 6.49   |
| 45 - 54 & Female                       | -0.2911                        | 0.11           | 0.52                     | 1.07   |
| 55 - 64 & Female                       | 0.2989                         | 0.09           | 0.95                     | 1.92   |
| 65 - 75 & Female                       | -0.0281                        | 0.85           | 0.73                     | 1.30   |
| >75 & Female                           | 0.1084                         | 0.36           | 0.89                     | 1.40   |
| <b>Pupil reactivity</b>                |                                |                |                          |        |
| Both reactive (reference)              | 0.0000                         |                | 1                        | 1      |
| Abnormal (both reactive)               | -0.4383                        | <0.0001        | 0.57                     | 0.73   |
| Abnormal (1 reactive)                  | -0.5325                        | <0.0001        | 0.50                     | 0.69   |
| Neither reactive                       | -2.0874                        | <0.0001        | 0.11                     | 0.14   |
| <b>Constant</b>                        | 4.9208                         | <0.0001        | 119.10                   | 157.59 |

Figure 1: Model Calibration

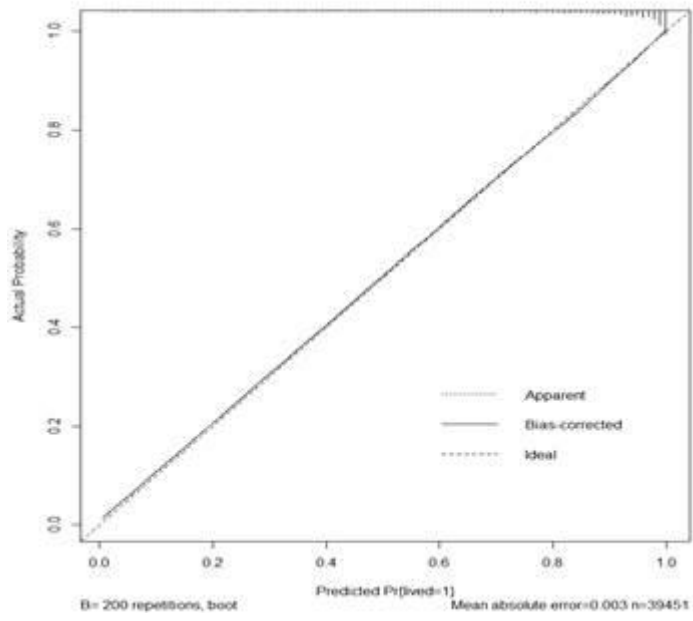

**Table 3: Hours to arrival at neurosurgical centre stratified by age**

| Hours to arrival at neurocentre | Age           |                |                |                |                |                |                |                |                |                |
|---------------------------------|---------------|----------------|----------------|----------------|----------------|----------------|----------------|----------------|----------------|----------------|
|                                 | 0 - 10        | 10 - 20        | 20 - 30        | 30 - 40        | 40 - 50        | 50 - 60        | 60 - 70        | 70 - 80        | 80 - 90        | 90+            |
| <b>0 - 4</b>                    | 50<br>(31.8%) | 434<br>(60.5%) | 748<br>(60.1%) | 543<br>(55.9%) | 550<br>(49.5%) | 603<br>(50.2%) | 591<br>(49.5%) | 604<br>(44.7%) | 799<br>(51.4%) | 293<br>(58.8%) |
| <b>4 - 12</b>                   | 6<br>(3.8%)   | 8 (1.1%)       | 25 (2%)        | 6 (0.6%)       | 28<br>(2.5%)   | 31<br>(2.6%)   | 27<br>(2.3%)   | 19<br>(1.4%)   | 39<br>(2.5%)   | 8 (1.6%)       |
| <b>12 - 24</b>                  | 31<br>(19.7%) | 112<br>(15.6%) | 162<br>(13%)   | 132<br>(13.6%) | 159<br>(14.3%) | 190<br>(15.8%) | 165<br>(13.8%) | 155<br>(11.5%) | 125<br>(8%)    | 47<br>(9.4%)   |
| <b>24 - 48</b>                  | 11 (7%)       | 19<br>(2.6%)   | 35<br>(2.8%)   | 35<br>(3.6%)   | 41<br>(3.7%)   | 56<br>(4.7%)   | 46<br>(3.8%)   | 51<br>(3.8%)   | 43<br>(2.8%)   | 9 (1.8%)       |
| <b>48 - 72</b>                  | 1<br>(0.6%)   | 7 (1%)         | 8 (0.6%)       | 8 (0.8%)       | 10<br>(0.9%)   | 11<br>(0.9%)   | 9 (0.8%)       | 9 (0.7%)       | 14<br>(0.9%)   | 2 (0.4%)       |
| <b>72+</b>                      | 6<br>(3.8%)   | 6 (0.8%)       | 13 (1%)        | 10 (1%)        | 28<br>(2.5%)   | 28<br>(2.3%)   | 34<br>(2.8%)   | 53<br>(3.9%)   | 94<br>(6.1%)   | 27<br>(5.4%)   |
| <b>Unknown</b>                  | 52<br>(33.1%) | 131<br>(18.3%) | 254<br>(20.4%) | 237<br>(24.4%) | 294<br>(26.5%) | 283<br>(23.5%) | 323<br>(27%)   | 459<br>(34%)   | 439<br>(28.3%) | 112<br>(22.5%) |

**Table 4: Rate of complications by age and transfer status**

| Age          | n            | Complications | % with complications |
|--------------|--------------|---------------|----------------------|
| <b>0-10</b>  | 211          | 35            | 16.6%                |
| <b>10-20</b> | 863          | 100           | 11.6%                |
| <b>20-30</b> | 1523         | 184           | 12.1%                |
| <b>30-40</b> | 1206         | 189           | 15.7%                |
| <b>40-50</b> | 1443         | 197           | 13.7%                |
| <b>50-60</b> | 1620         | 271           | 16.7%                |
| <b>60-70</b> | 1760         | 277           | 15.7%                |
| <b>70-80</b> | 2380         | 395           | 16.6%                |
| <b>80-90</b> | 3508         | 613           | 17.5%                |
| <b>90+</b>   | 1305         | 221           | 16.9%                |
| <b>Total</b> | <b>15819</b> | <b>2482</b>   | <b>15.7%</b>         |

| Age          | n            | Complications | % with complications |
|--------------|--------------|---------------|----------------------|
| No transfer  | 10893        | 1611          | 14.8%                |
| Transfer     | 4926         | 871           | 17.7%                |
| <b>Total</b> | <b>15819</b> | <b>2482</b>   | <b>15.7%</b>         |

**Table 5: Mortality stratified by GCS and Head AIS**

| TBI severity     | n            | Mortality   |              |                    | Predicted mortality % |
|------------------|--------------|-------------|--------------|--------------------|-----------------------|
|                  |              | n           | %            | 95% CI             |                       |
| Mild TBI         | 9285         | 730         | 7.9%         | 7.3% - 8.4%        | 8.6%                  |
| Moderate TBI     | 790          | 178         | 22.5%        | 19.6% - 25.4%      | 23.6%                 |
| Severe TBI       | 3228         | 1304        | 40.4%        | 38.7% - 42.1%      | 36.1%*                |
| GCS not recorded | 629          | 98          | 15.6%        | 12.7% - 18.4%      | 12.4%                 |
| <b>Total</b>     | <b>13932</b> | <b>2310</b> | <b>16.6%</b> | <b>16% - 17.2%</b> | <b>16.0%</b>          |

| AIS TBI severity | n            | Mortality   |              |                    | Predicted mortality % |
|------------------|--------------|-------------|--------------|--------------------|-----------------------|
|                  |              | n           | %            | 95% CI             |                       |
| 3                | 2480         | 155         | 6.3%         | 5.3% - 7.2%        | 5.9%                  |
| 4                | 5828         | 475         | 8.2%         | 7.4% - 8.9%        | 9.6%                  |
| 5                | 5614         | 1671        | 29.8%        | 28.6% - 31%        | 26.9%                 |
| 6                | 10           | 9           | 90.0%        | 71.4% - 100%       | 68.0%                 |
| <b>Total</b>     | <b>13932</b> | <b>2310</b> | <b>16.6%</b> | <b>16% - 17.2%</b> | <b>16.0%</b>          |

| Outcome      | n            | Outcome at discharge | Outcome at 30 days |
|--------------|--------------|----------------------|--------------------|
| Alive        | 11622        | 9642                 | 1980               |
| Dead         | 2310         | 2310                 | 0                  |
| <b>Total</b> | <b>13932</b> | <b>11952</b>         | <b>1980</b>        |

\*Although in this cohort of severe TBI patients predicted mortality differs from actual mortality, the model is not specifically calibrated by the severity subsets. Overall, mortality across all patients ('total' row) matches the predicted mortality from the PS14<sup>n</sup> model.

**Table 6: Complication rate stratified by location of transfer**

| <b>Transfer status</b> | <b>n</b>     | <b>Complications</b> | <b>% with complications</b> |
|------------------------|--------------|----------------------|-----------------------------|
| No transfer            | 10893        | 1611                 | 14.8%                       |
| Transfer               | 4926         | 871                  | 17.7%                       |
| <b>Total</b>           | <b>15819</b> | <b>2482</b>          | <b>15.7%</b>                |
